# Supplementary material for: Targeting RNA-Mediated Toxicity in C9orf72 ALS and/or FTD by RNAi-Based Gene Therapy
Source: PubMed Central journal article supplement — Mol Ther Nucleic Acids. 2019 Feb 11;16:26–37. doi: 10.1016/j.omtn.2019.02.001 (PMC6393708; doi:10.1016/j.omtn.2019.02.001), 2019-02-11
Supplement: mmc1.pdf [file mmc1.pdf]

OMTN, Volume 16

## **Supplemental Information**

### **Targeting RNA-Mediated Toxicity**

#### **in C9orf72 ALS and/or FTD**

#### **by RNAi-Based Gene Therapy**

**Raygene Martier, Jolanda M. Liefhebber, Ana García-Osta, Jana Miniarikova, Mar Cuadrado-Tejedor, Maria Espelosin, Susana Ursua, Harald Petry, Sander J. van Deventer, Melvin M. Evers, and Pavlina Konstantinova**

## Supplementary material

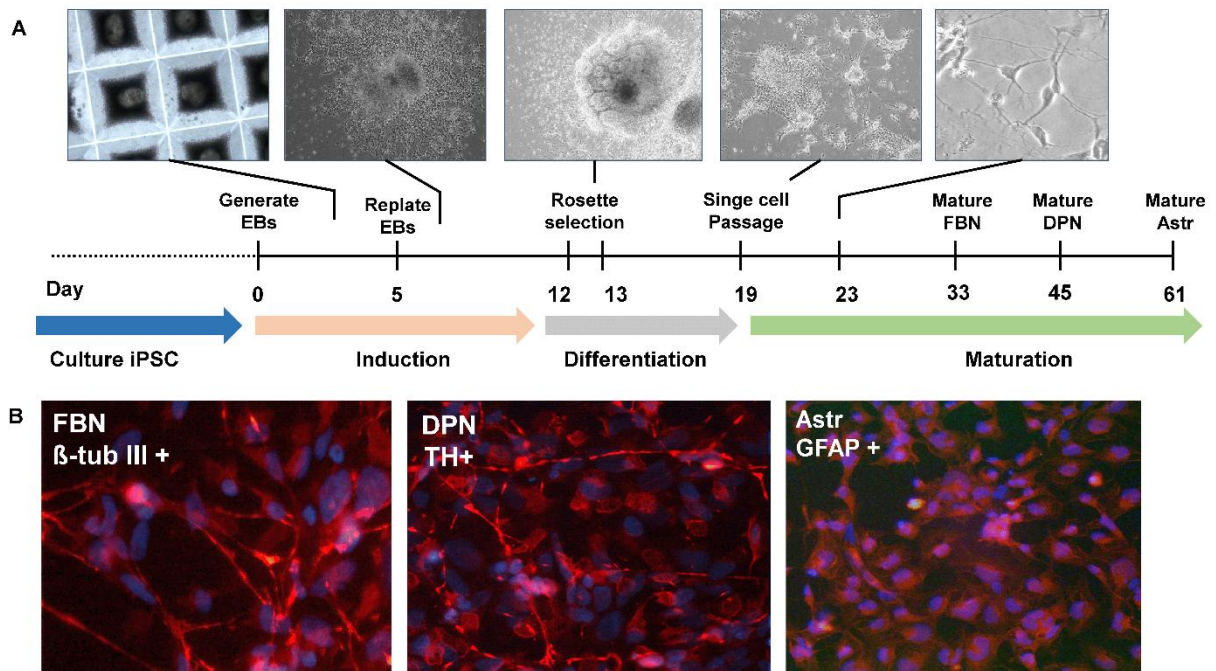

**Figure S1. Differentiation and characterization of iPSC neurons.** a) iPSC cells were seeded on AggreWell800 plates and cultured in STEMdiff Neural Induction Medium until day 5 to induce embryoid bodies formation. Embryoid bodies were harvested and replated in STEMdiff Neural Induction Medium for 7 days. At day 12, Rosettes were selected with rosette selection medium and differentiated in STEMdiff Neuron Differentiation medium or STEMdiff astrocyte Differentiation medium (STEMCELL) for 5 days. The cells were then matured into mature FBN or astrocytes for one week.

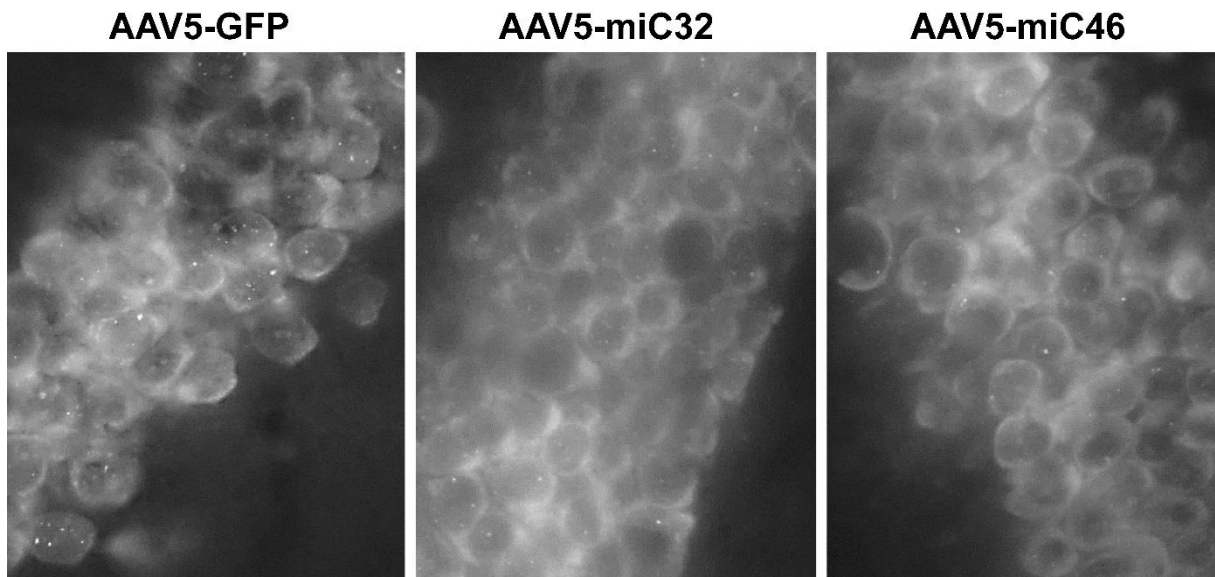

Figure S2. Reduction of RNA foci in hippocampus of Tg(*C9orf72\_3*) line 112 mice.

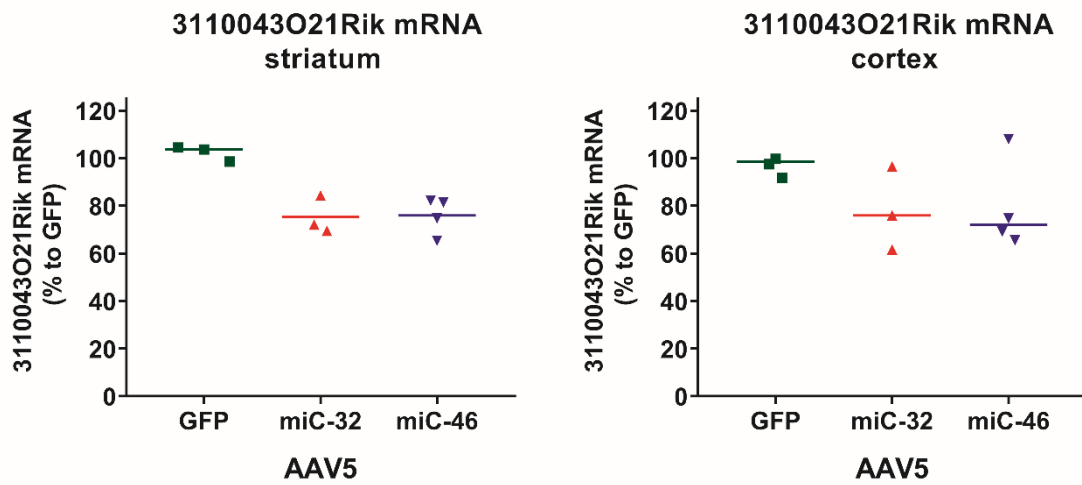

Figure S3. Reduction of the mouse *C9orf72* in striatum and cortex of C9BAC mice. Total RNA was isolated from the striatum and cortex of mice treated with AAV5-miC32 and AAV5-miC46. RT-qPCR was performed using primers to detect the mouse *C9orf72* ortholog (3110043021Rik). RNA input levels were normalized to GAPDH and set relative to AAV-GFP treated mice.

| miC precursor                                     | mature miRNA (Guide strand)               | length | reads  | % reads | mature miRNA (passenger strand)               | nt length | reads | % reads |
|---------------------------------------------------|-------------------------------------------|--------|--------|---------|-----------------------------------------------|-----------|-------|---------|
| <b>C9BAC mouse striatum 333 (AAV5_miC32)</b>      |                                           |        |        |         |                                               |           |       |         |
| Total expression values: 454435                   |                                           |        |        |         |                                               |           |       |         |
| 5' u c u g g c passenger c g u c u a              | 1 C T T A C T C T A G G A C C A A G A A   | 20     | 317977 | 70,0%   | 1 C T T G G T C C T A G A G T A A C G G       | 19        | 17591 | 3,9%    |
| g c c u u c u u g g u c c u g a g a a g g a c u   | 2 C T T A C T C T A G G A C C A A G A A   | 19     | 22720  | 5,0%    | 2 C T T G G T C C T A G A G T A A C G G A     | 20        | 11244 | 2,5%    |
| c e g a a g a a c c a g g a t c u c a u u c c u g | 3 C T T A C T C T A G G A C C A A G A A T | 20     | 9351   | 2,1%    | 3 C T T G G T C C T A G A G T A A C G G A C   | 21        | 9383  | 2,1%    |
| a u a g g a guide a a a u c                       |                                           |        | total  | 77,0%   |                                               |           | total | 8,4%    |
| 3' a a a u c                                      |                                           |        |        |         |                                               |           |       |         |
| <b>C9BAC mouse striatum 334 (AAV5_miC32)</b>      |                                           |        |        |         |                                               |           |       |         |
| Total expression values: 394961                   |                                           |        |        |         |                                               |           |       |         |
| 5' u c u g g c passenger c g u c u a              | 1 C T T A C T C T A G G A C C A A G A A   | 20     | 255155 | 64,6%   | 1 C T T G G T C C T A G A G T A A C G G       | 19        | 25219 | 6,4%    |
| g c c u u c u u g g u c c u g a g a a g g a c u   | 2 C T T A C T C T A G G A C C A A G A A   | 19     | 18480  | 4,7%    | 2 C T T G G T C C T A G A G T A A C G G A     | 18        | 14210 | 3,6%    |
| c e g a a g a a c c a g g a t c u c a u u c c u g | 3 C T T A C T C T A G G A C C A A G A A T | 20     | 7553   | 1,9%    | 3 C T T G G T C C T A G A G T A A C G G A     | 21        | 13098 | 3,3%    |
| a u a g g a guide a a a u c                       |                                           |        | total  | 71,2%   |                                               |           | total | 13,3%   |
| 3' a a a u c                                      |                                           |        |        |         |                                               |           |       |         |
| <b>C9BAC mouse striatum 341 (AAV5_miC32)</b>      |                                           |        |        |         |                                               |           |       |         |
| Total expression values: 257715                   |                                           |        |        |         |                                               |           |       |         |
| 5' u c u g g c passenger c g u c u a              | 1 C T T A C T C T A G G A C C A A G A A   | 20     | 169312 | 65,7%   | 1 C T T G G T C C T A G A G T A A C G G       | 19        | 15032 | 5,8%    |
| g c c u u c u u g g u c c u g a g a a g g a c u   | 2 C T T A C T C T A G G A C C A A G A A   | 19     | 12731  | 4,9%    | 2 C T T G G T C C T A G A G T A A C G G A     | 20        | 9099  | 3,5%    |
| c e g a a g a a c c a g g a t c u c a u u c c u g | 3 C T T A C T C T A G G A C C A A G A A T | 20     | 4820   | 1,9%    | 3 C T T G G T C C T A G A G T A A C G G       | 18        | 8177  | 3,2%    |
| a u a g g a guide a a a u c                       |                                           |        | total  | 72,5%   |                                               |           | total | 12,5%   |
| 3' a a a u c                                      |                                           |        |        |         |                                               |           |       |         |
| <b>C9BAC mouse striatum 342 (AAV5_miC32)</b>      |                                           |        |        |         |                                               |           |       |         |
| Total expression values: 423128                   |                                           |        |        |         |                                               |           |       |         |
| 5' u c u g g c passenger c g u c u a              | 1 C T T A C T C T A G G A C C A A G A A   | 20     | 283816 | 67,1%   | 1 C T T G G T C C T A G A G T A A C G G       | 19        | 19759 | 4,7%    |
| g c c u u c u u g g u c c u g a g a a g g a c u   | 2 C T T A C T C T A G G A C C A A G A A   | 19     | 22210  | 5,2%    | 2 C T T G G T C C T A G A G T A A C G G A     | 20        | 12406 | 2,9%    |
| c e g a a g a a c c a g g a t c u c a u u c c u g | 3 C T T A C T C T A G G A C C A A G A A T | 20     | 8896   | 2,1%    | 3 C T T G G T C C T A G A G T A A C G G A C   | 18        | 11793 | 2,8%    |
| a u a g g a guide a a a u c                       |                                           |        | total  | 74,4%   |                                               |           | total | 10,4%   |
| 3' a a a u c                                      |                                           |        |        |         |                                               |           |       |         |
| <b>C9BAC mouse striatum 323 (AAV5_miC46)</b>      |                                           |        |        |         |                                               |           |       |         |
| Total expression values: 22153                    |                                           |        |        |         |                                               |           |       |         |
| 5' u c u g g c passenger u g u c u a              | 1 T A T C T T C A G G T T C C G A A G A G | 20     | 870    | 3,9%    | 1 C T T O G G A A C C T G A A G A T T G A C   | 21        | 16507 | 74,5%   |
| g c c c u c u u c g g a a c c u g a a g a u g a c | 2 T A T C T T C A G G T T C C G A A       | 17     | 343    | 1,5%    | 2 C T T O G G A A C C T G A A G A T T G A     | 20        | 1310  | 5,9%    |
| c e g g a g a a c c u u g g a c u u c u a u u g   | 3 T A T C T T C A G G T T C C G A         | 16     | 277    | 1,3%    | 3 C T T O G G A A C C T G A A G A T T G A C G | 22        | 460   | 2,1%    |
| a u a g g a guide a a a u c                       |                                           |        | total  | 6,7%    |                                               |           | total | 82,5%   |
| 3' a a a u c                                      |                                           |        |        |         |                                               |           |       |         |
| <b>C9BAC mouse striatum 324 (AAV5_miC46)</b>      |                                           |        |        |         |                                               |           |       |         |
| Total expression values: 14529                    |                                           |        |        |         |                                               |           |       |         |
| 5' u c u g g c passenger u g u c u a              | 1 T A T C T T C A G G T T C C G A A G A G | 20     | 1873   | 12,9%   | 1 C T T O G G A A C C T G A A G A T T G A C   | 21        | 9167  | 63,1%   |
| g c c c u c u u c g g a a c c u g a a g a u g a c | 2 T A T C T T C A G G T T C C G A A       | 17     | 580    | 4,0%    | 2 C T T O G G A A C C T G A A G A T T G A     | 20        | 737   | 3,3%    |
| c e g g a g a a c c u u g g a c u u c u a u u g   | 3 T A T C T T C A G G T T C C G A A G A   | 19     | 196    | 1,3%    | 3 C T T O G G A A C C T G A A G A T T G A C G | 22        | 301   | 1,4%    |
| a u a g g a guide a a a u c                       |                                           |        | total  | 18,2%   |                                               |           | total | 67,8%   |
| 3' a a a u c                                      |                                           |        |        |         |                                               |           |       |         |
| <b>C9BAC mouse striatum 353 (AAV5_miC46)</b>      |                                           |        |        |         |                                               |           |       |         |
| Total expression values: 20523                    |                                           |        |        |         |                                               |           |       |         |
| 5' u c u g g c passenger u g u c u a              | 1 T A T C T T C A G G T T C C G A A G A G | 20     | 2751   | 13,4%   | 1 C T T O G G A A C C T G A A G A T T G A C   | 21        | 11058 | 53,9%   |
| g c c c u c u u c g g a a c c u g a a g a u g a c | 2 T A T C T T C A G G T T C C G A A       | 17     | 469    | 2,3%    | 2 C T T O G G A A C C T G A A G A T T G A     | 20        | 1297  | 6,3%    |
| c e g g a g a a c c u u g g a c u u c u a u u g   | 3 T C A G G T T C C G A A G A G           | 15     | 239    | 1,2%    | 3 T C G G A A C C T G A A G A T T G A C       | 19        | 1012  | 4,9%    |
| a u a g g a guide a a a u c                       |                                           |        | total  | 16,9%   |                                               |           | total | 65,1%   |
| 3' a a a u c                                      |                                           |        |        |         |                                               |           |       |         |
| <b>C9BAC mouse striatum 358 (AAV5_miC46)</b>      |                                           |        |        |         |                                               |           |       |         |
| Total expression values: 7758                     |                                           |        |        |         |                                               |           |       |         |
| 5' u c u g g c passenger u g u c u a              | 1 T A T C T T C A G G T T C C G A A G A G | 20     | 1386   | 17,9%   | 1 C T T O G G A A C C T G A A G A T T G A C   | 21        | 4871  | 62,8%   |
| g c c c u c u u c g g a a c c u g a a g a u g a c | 2 T A T C T T C A G G T T C C G A A       | 17     | 153    | 2,0%    | 2 C T T O G G A A C C T G A A G A T T G A     | 20        | 280   | 3,6%    |
| c e g g a g a a c c u u g g a c u u c u a u u g   | 3 T A T C T T C A G G T T C C G A A G A   | 19     | 132    | 1,7%    | 3 C T T O G G A A C C T G A A G A T T G A C G | 22        | 135   | 1,7%    |
| a u a g g a guide a a a u c                       |                                           |        | total  | 21,5%   |                                               |           | total | 68,1%   |
| 3' a a a u c                                      |                                           |        |        |         |                                               |           |       |         |

**Table S1. miC processing in mice brain.** Sequence distribution (%) of guide- and passenger strands of reads mapping to miC32 and miC46. RNA was isolated from striatum of mice that were injected with AAV5-miC32 and AAV5-miC46 and small RNA NGS was performed. The scaffold is shown in the first column. Based on miRBase, the predicted guide and passenger strand sequences of the cellular pri-miRNA scaffolds are indicated in red and blue, respectively. The 5' and 3' flanking nucleotides are indicated in black. The three most abundant guide and passenger strand sequences are shown.
